# Supplementary material for: Structure of antiviral drug bulevirtide bound to hepatitis B and D virus receptor protein NTCP
Source: Springer Nature journal article supplement (doi:10.1038/s41467-024-46706-w), 2024-03-20
Supplement: MOESM1 [file 41467_2024_46706_MOESM1_ESM.pdf › 41467_2024_46706_MOESM1_ESM.pdf]

# Supplementary Information

## Structure of antiviral drug bulevirtide bound to hepatitis B and D virus receptor protein NTCP

Hongtao Liu<sup>1</sup>, Dariusz Zakrzewicz<sup>2</sup>, Kamil Nosol<sup>1</sup>, Rossitza N. Irobalieva<sup>1</sup>, Somnath Mukherjee<sup>3</sup>, Rose Bang-Sørensen<sup>1</sup>, Nora Goldmann<sup>4,5</sup>, Sebastian Kunz<sup>2</sup>, Lorenzo Rossi<sup>1</sup>, Anthony A. Kossiakoff<sup>3,\*</sup>, Stephan Urban<sup>6,7,\*</sup>, Dieter Glebe<sup>4,5,\*</sup>, Joachim Geyer<sup>2,\*</sup>, & Kaspar P. Locher<sup>1,\*</sup>

<sup>1</sup>Institute of Molecular Biology and Biophysics, ETH Zürich, Zürich, Switzerland

<sup>2</sup>Institute of Pharmacology and Toxicology, Faculty of Veterinary Medicine, Justus Liebig University Giessen, Giessen, Germany

<sup>3</sup>Department of Biochemistry and Molecular Biology, The University of Chicago, Chicago, IL, USA

<sup>4</sup>Institute of Medical Virology, National Reference Centre for Hepatitis B Viruses and Hepatitis D Viruses, Justus Liebig University Giessen, Giessen, Germany

<sup>5</sup>German Center for Infection Research (DZIF) - Giessen-Marburg-Langen Partner Site, Giessen, Germany

<sup>6</sup>Department of Infectious Diseases, Molecular Virology, Heidelberg University, Heidelberg, Germany

<sup>7</sup>German Center for Infection Research (DZIF) - Heidelberg Partner Site, Heidelberg, Germany

\*To whom correspondence may be addressed. Email: [koss@bsd.uchicago.edu](mailto:koss@bsd.uchicago.edu), [Stephan.Urban@med.uni-heidelberg.de](mailto:Stephan.Urban@med.uni-heidelberg.de), [Dieter.Glebe@viro.med.uni-giessen.de](mailto:Dieter.Glebe@viro.med.uni-giessen.de), [Joachim.M.Geyer@vetmed.uni-giessen.de](mailto:Joachim.M.Geyer@vetmed.uni-giessen.de), [locher@mol.biol.ethz.ch](mailto:locher@mol.biol.ethz.ch)

### **This PDF file includes:**

Supplementary Tables 1-2

Supplementary Figures 1-7

Supplementary References

**Supplementary Table 1. Cryo-EM data collection and processing.**

| Sample                                                        | NTCP-BLV-Fab3-Nb   |
|---------------------------------------------------------------|--------------------|
| PDB                                                           | 8RQF               |
| EMDB                                                          | EMD-19440          |
| <b>Data collection and processing</b>                         |                    |
| Microscope                                                    | Titan Krios G4     |
| Electron gun                                                  | FEG                |
| Energy filter                                                 | GIF BioQuantum     |
| Detector                                                      | Gatan K3           |
| Voltage (kV)                                                  | 300                |
| Magnification                                                 | 130,000x           |
| Electron exposure per movie (e <sup>-</sup> /Å <sup>2</sup> ) | 55                 |
| Defocus range (μm)                                            | -0.5 to -2.5       |
| Pixel size (Å)                                                | 0.648              |
| Numbers of micrographs                                        | 2,610              |
| Symmetry imposed                                              | C1                 |
| Initial particle images (no.)                                 | 1,696,766          |
| Final particle images (no.)                                   | 128,700            |
| Map resolution (Å) at FSC threshold of 0.143                  | 3.41               |
| Map sharpening <i>B</i> factor (Å <sup>2</sup> )              | 118.0              |
| Processing software                                           | CryoSPARC v4.4.0   |
| <b>Refinement</b>                                             |                    |
| Initial model used (PDB code)                                 | 7ZYI               |
| FSC threshold (0.143/0.5)                                     | 3.4/3.6            |
| Model composition                                             |                    |
| Non-hydrogen atoms                                            | 6,950              |
| Protein residues                                              | 903                |
| Ligands                                                       | LIG: 1             |
| B factor (Å <sup>2</sup> )                                    |                    |
| Protein                                                       | 22.96/177.66/83.01 |
| Ligand                                                        | 44.34/48.12/48.12  |
| R. m. s. d deviations                                         |                    |
| Bond lengths (Å)                                              | 0.003              |
| Bond angles (°)                                               | 0.640              |
| <b>Validation</b>                                             |                    |
| MolProbity score                                              | 1.81               |
| Clash score                                                   | 9.09               |
| Poor rotamers (%)                                             | 0.26               |
| Ramachandran plot                                             |                    |
| Favored (%)                                                   | 95.30              |
| Allowed (%)                                                   | 4.70               |
| Disallowed (%)                                                | 0.00               |

**Supplementary Table 2. List of interactions between BLV and NTCP**

| BLV peptide |       | NTCP                                                           |
|-------------|-------|----------------------------------------------------------------|
| No.         | AA    |                                                                |
| 2           | Myr-G | F128, C129, L131, G132, M133, D152, Y156, K157                 |
| 3           | T     | D152, K153, V272                                               |
| 4           | N     | D152, K153, V154, P155, Y156, T268, I269, V272                 |
| 5           | L     | K157, G158                                                     |
| 6           | S     | P155, G158, I159, Q264, T268                                   |
| 7           | V     | G158, I161, S162                                               |
| 8           | P     | P154, G158, I159, S162, N262, Q264, L265                       |
| 9           | N     | L31, V32, L35, N262, Q264                                      |
| 10          | P     | L35, G102, N103, S162, V166, N262, V263, M290                  |
| 11          | L     | L31, M34, L35, I38, L104                                       |
| 12          | G     | L31, V263, Q264, M290                                          |
| 13          | F     | L27, L31, V202, S206, V263, Q264, S267, F283, P286, L287, M290 |
| 14          | F     | F18, D24, L27, V210, Q264, S267, F283, F284, L287              |
| 15          | P     | Q264, S267, T268, N271, F283                                   |
| 16          | D     | G19, D24, S28, Q264                                            |
| 17          | H     | D24, L27, S28, L31, Q264                                       |
| 18          | Q     | V32, Q264, T268                                                |
| 19          | L     | V32, L35, S162, L165, V166                                     |
| 20          | D     | -                                                              |
| 21          | P     | -                                                              |
| 22          | A     | -                                                              |
| 23          | F     | L25, S28, V29, V32                                             |
| 24          | G     | -                                                              |
| 25          | A     | G19                                                            |
| 26          | N     | G19, K20, D24, L25, S28                                        |
| 27          | S     | G19, K20                                                       |
| 28          | N     | K20                                                            |
| 29          | N     | -                                                              |
| 30          | P     | K20                                                            |
| 31          | D     | -                                                              |
| 32          | W     | T268, N271, V272                                               |
| 33          | D     | N271, V272                                                     |
| 34          | F     | -                                                              |
| 35          | N     | K153, V272, A273                                               |
| 36          | P     | -                                                              |
| 37          | N     | -                                                              |
| 38          | K     | N271, V272, A273, F274, P275, P276                             |
| 39          | D     | Y146, A273, F274, P275, V278                                   |
| 40          | H     | P275, E277, V278                                               |

|    |   |                                             |
|----|---|---------------------------------------------|
| 41 | W | N87, I88, L91, I145, Y146, D147, F274, V278 |
| 42 | P | -                                           |
| 43 | E | N87, I145, D147                             |
| 44 | A | K86, N87, I88, V278                         |
| 45 | N | K86                                         |
| 46 | K | L85, K86, N87                               |
| 47 | V | R84, L85, K86, N87                          |
| 48 | G | N87, G144, I145                             |

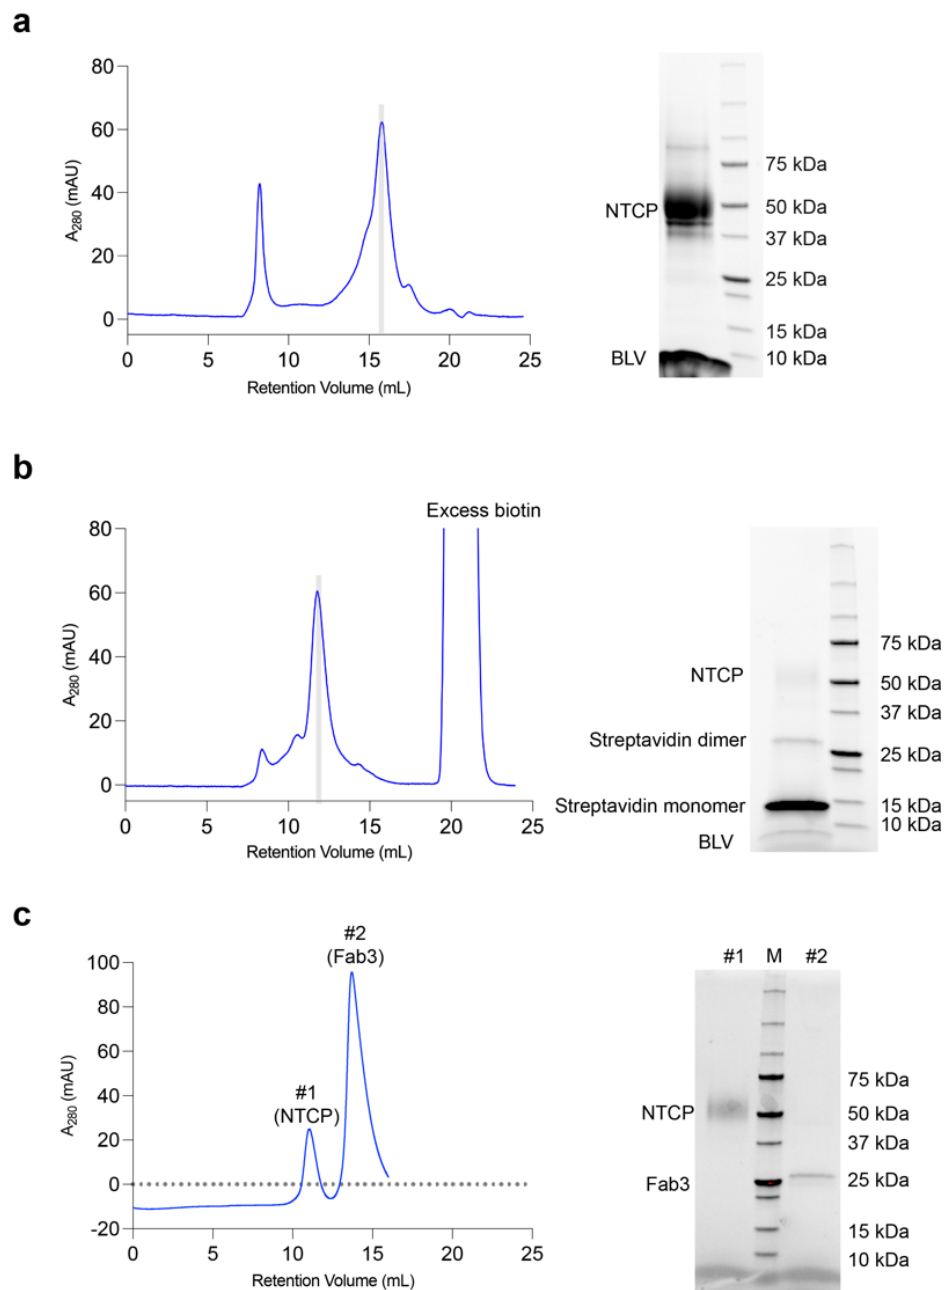

**Supplementary Fig. 1. Purification of the NTCP-BLV complex.**

**a** Left: Size-exclusion chromatogram (SEC) of detergent-solubilized NTCP bound to BLV. Right: SDS-PAGE analysis of the highlighted fraction. **b** Left: SEC of NTCP-BLV complex after biotinylation. Highlighted fraction was used for pull-down assay. Right: SDS-PAGE analysis of a sample immobilized on streptavidin-coated paramagnetic particles (see Methods section). **c** Left: SEC of NTCP and Fab3 mixture in the absence of BLV, confirming lack of complex formation. Right: SDS-PAGE analysis of selected fractions.

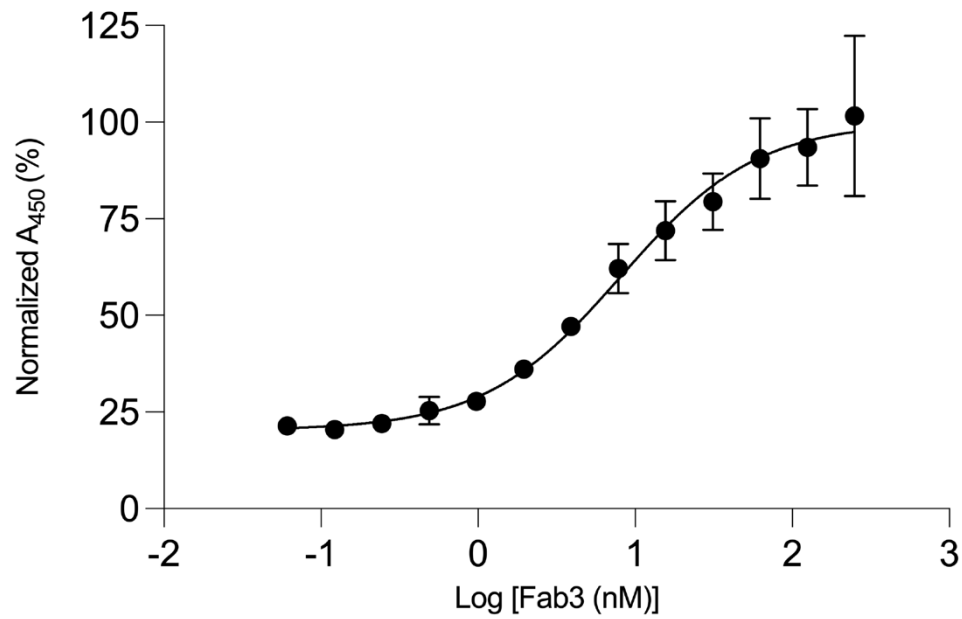

**Supplementary Fig. 2. Estimation of the binding affinity ( $EC_{50}$ ) of Fab3 to BLV-bound NTCP in detergent.**

Normalized protein ELISA at varying concentrations of Fab3 to determine the binding affinity,  $EC_{50}$ , of Fab3 to detergent-solubilized BLV-bound NTCP. The  $EC_{50}$  was calculated to be 8 nM. Data points represent the mean, error bars indicate the standard deviation of three independent measurements.

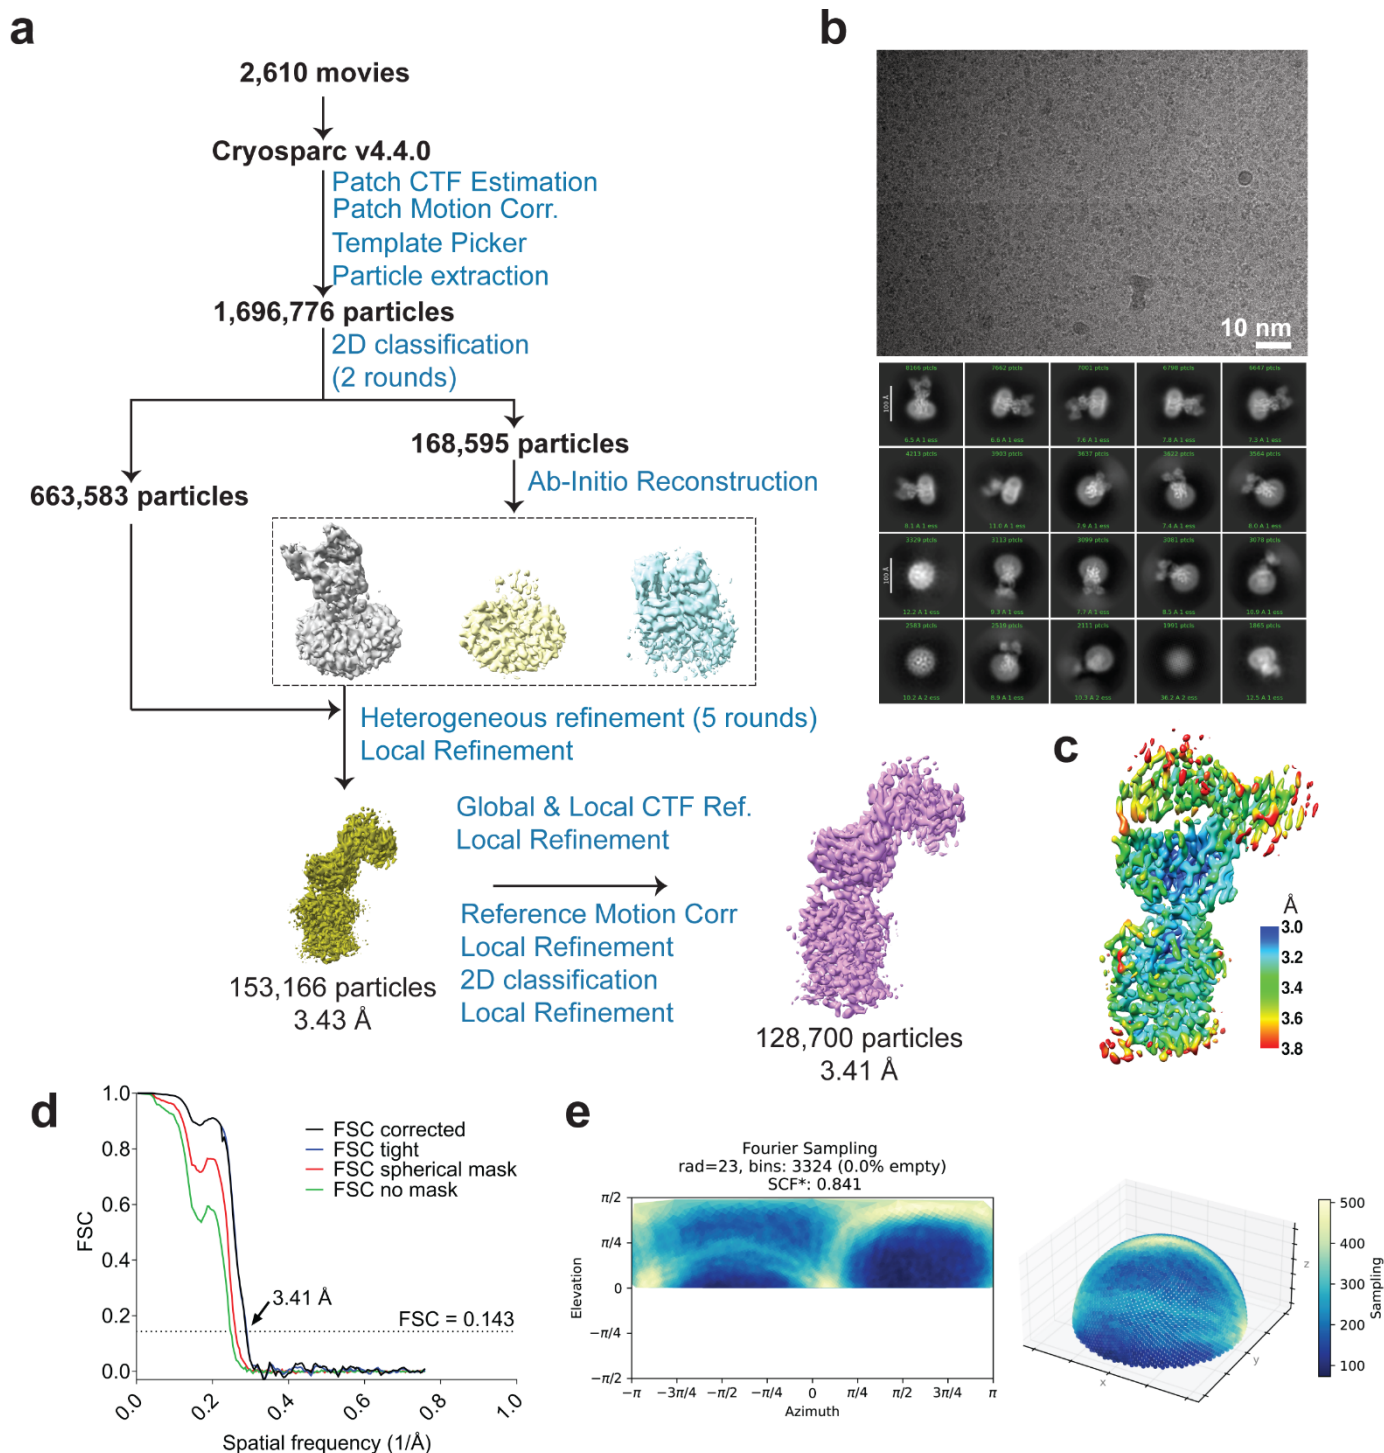

**Supplementary Fig. 3. Cryo-EM data processing of the NTCP-BLV-Fab3-Nb complex.**

**a** Data processing flowchart. **b** Representative motion-corrected micrograph and 2D class averages. **c** Final map colored by local resolution estimation. **d** Fourier shell correlation (FSC) and **e** orientation distribution as calculated in CryoSPARC. The Sampling Compensation factor (SCF) has a range [0,1] with higher values indicating better distribution<sup>1</sup>.

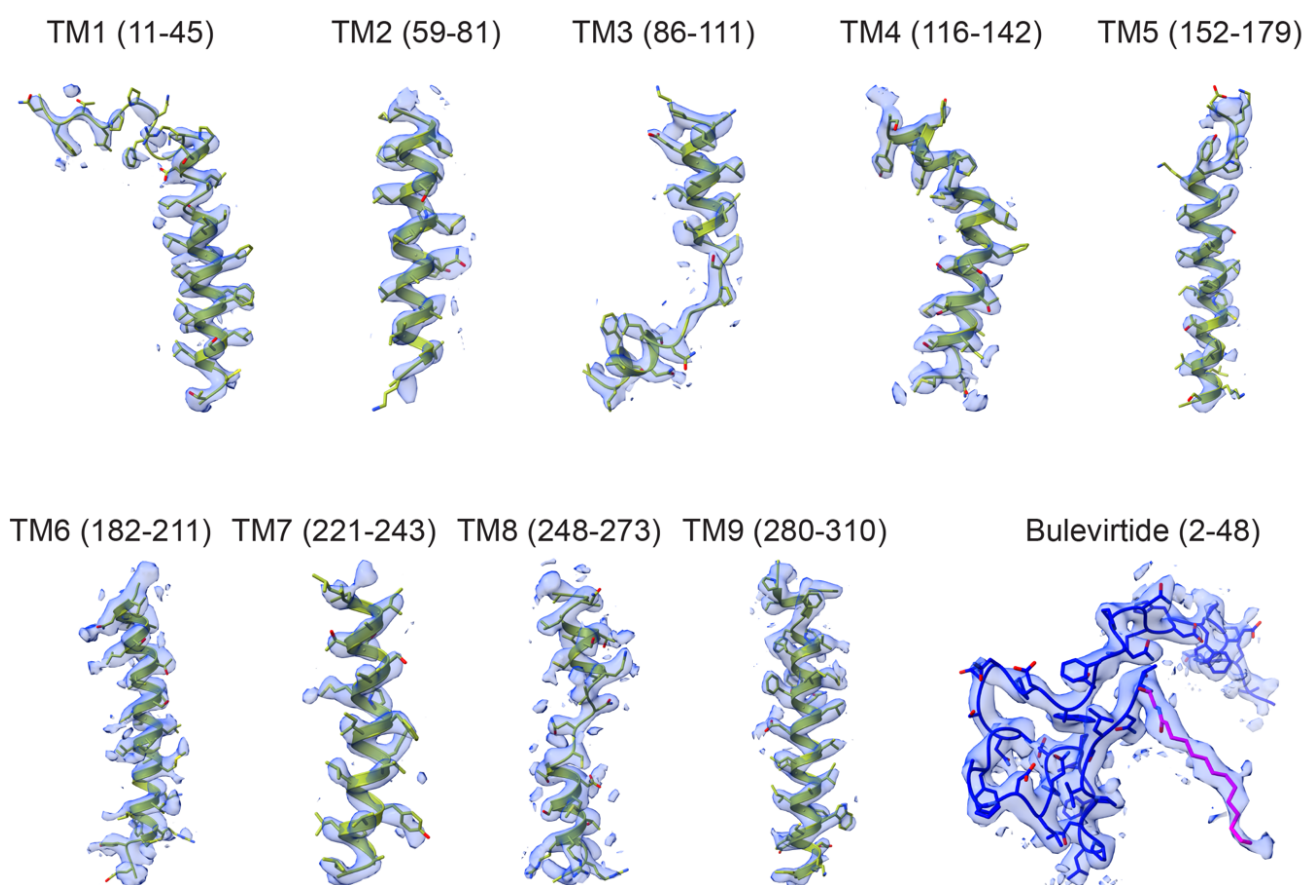

**Supplementary Fig. 4. Cryo-EM densities of the individual NTCP TM helices and Bulevirtide**

TM helices of NTCP are shown in green and the Bulevirtide peptide in blue. The corresponding EM density is displayed as transparent blue surface.



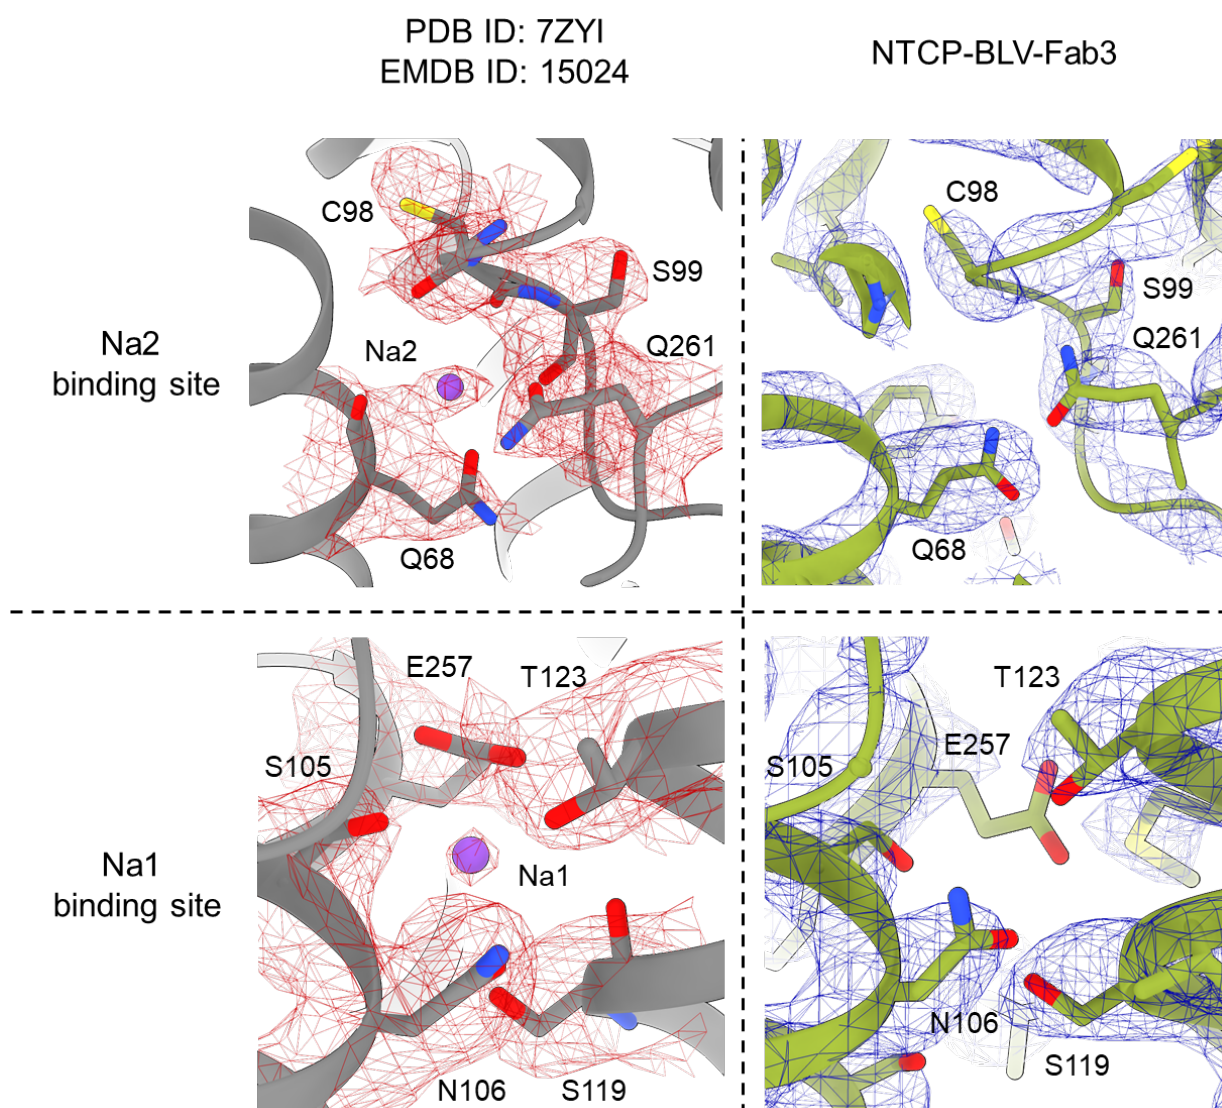

**Supplementary Fig. 5. Comparison of sodium binding sites in substrate-bound and BLV-bound NTCP.**

The structure of substrate-bound NTCP (PDB ID: 7ZYI, EMD ID: 15024) is shown in grey ribbon representation, and residues coordinating bound sodium ions (Na1 and Na2) are shown in stick representation and labeled. The EM density is shown as red mesh. The structure of BLV-bound NTCP (this study) is shown in green ribbon representation, residues are labeled, and the EM density is shown as blue mesh.

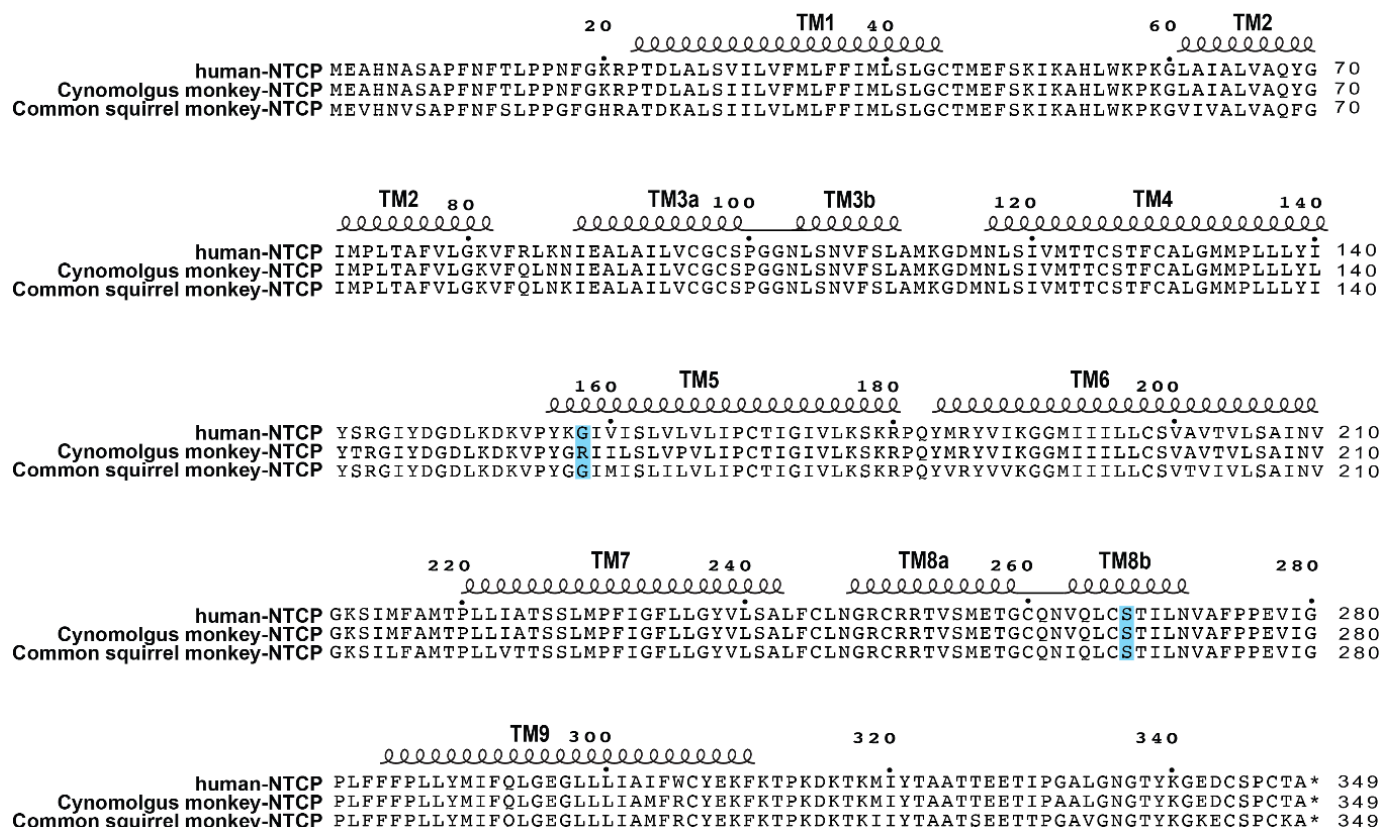

**Supplementary Fig. 6. Sequence alignment of NTCP among different primates.**

Amino acid sequence alignment of NTCP from human, Cynomolgus monkey (representative of Old World Monkeys), and Common squirrel monkey (representative of New World Monkeys). Residues highlighted in blue are discussed in the text.

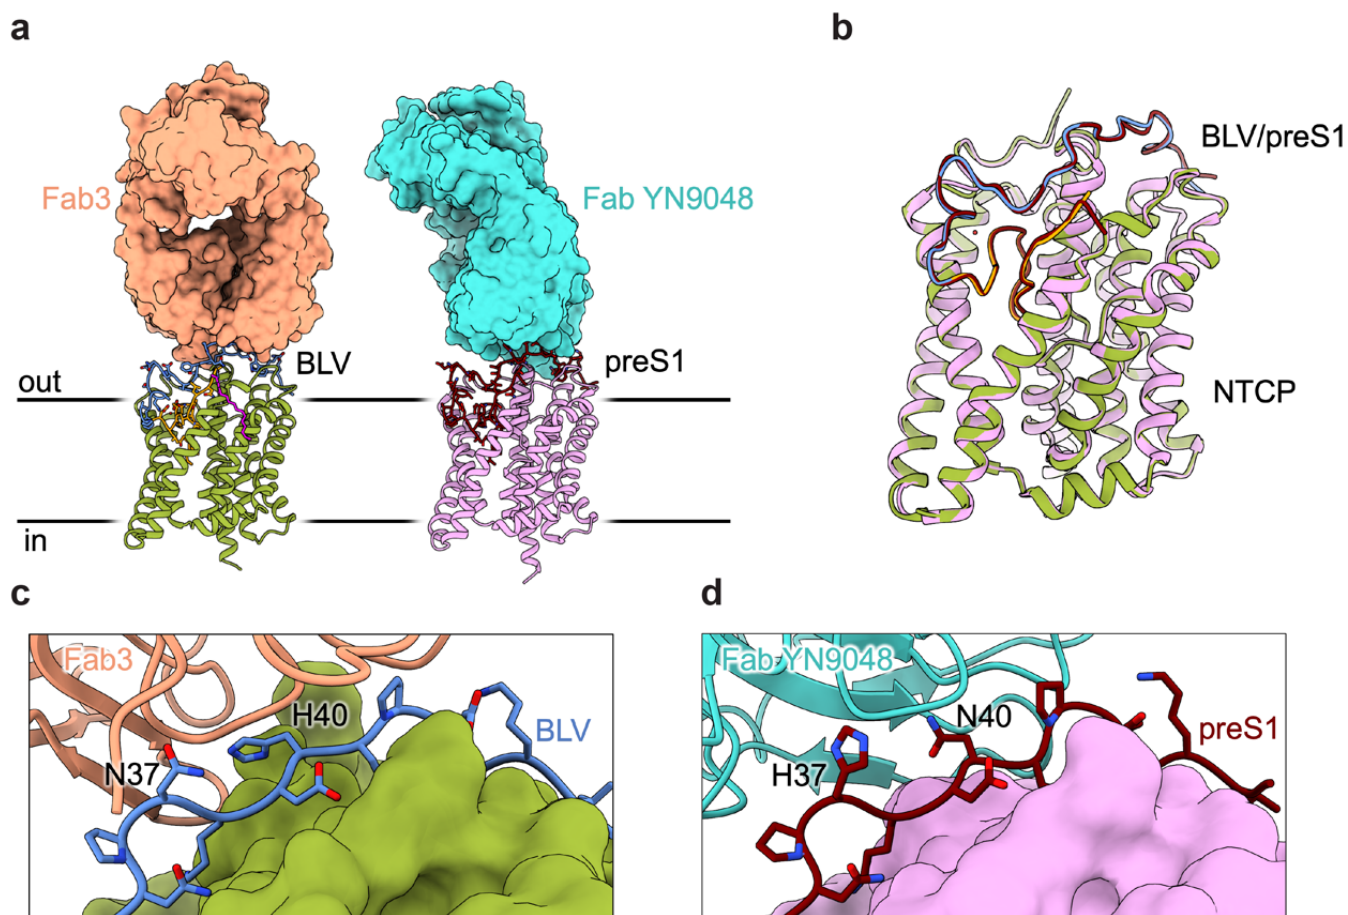

**Supplementary Fig. 7. Comparison of BLV-bound and preS1-bound NTCP structures.**

**a** Structure of NTCP-BLV-Fab3-Nb (this study) and NTCP-preS1-Fab YN9048 (PDB ID: 8HRX)<sup>2</sup>. NTCP is displayed in ribbon representation, Fabs as surface, and bound peptides as sticks. **b** Superposition of BLV-bound and preS1-bound NTCP structures, colored as in panel **a**. **c-d** Close-up view of the peptides interacting with the corresponding Fabs. The two residues labeled are involved in Fab binding and differ between BLV (**c**) and preS1 (**d**).

## Supplementary References

- 1 Baldwin, P.R. and Lyumkis, D. Tools for visualizing and analyzing Fourier space sampling in Cryo-EM. *Prog. Biophys. Mol. Biol.* (2021).  
<https://doi.org/10.1016/j.pbiomolbio.2019.09.002>
- 2 Asami, J. et al. Structural basis of hepatitis B virus receptor binding. *Nat Struct Mol Biol* (2024). <https://doi.org/10.1038/s41594-023-01191-5>
