# Supplementary material for: Structure of antiviral drug bulevirtide bound to hepatitis B and D virus receptor protein NTCP
Source: Nat Commun. 2024 Mar 20;15:2476. doi: 10.1038/s41467-024-46706-w (PMC10954734; doi:10.1038/s41467-024-46706-w)
Supplement: Supplementary file 4 — Source data [file 41467_2024_46706_MOESM4_ESM.xlsx]

## Sheet: Fig 2
Fig 2b
		HEK-NTCP (+Na+)				HEK-NTCP (-Na+)				HEK293 (+Na+)				HEK293 (-Na+)
	-preS1-AX568	2862	3697	2547	3613	2344	5005	2254	2930	2763	2922	2636	3325	2681	3796	2560	2743
	+preS1-AX568	35517	34146	34133	37366	30441	27918	29462	31320	3188	3127	3104	2920	3225	2983	3554	3189
	+preS1-AX568+TC	3361	3497	4053	3970	3752	3206	5771	5799	3332	3416	3256	3426	3366	2674	3292	2893
Fig 2e
	Ctrl1	25 nM NTCP	50 nM NTCP	100 nM NTCP	100 nM NTCP G158R
	1265	1205	2329	6504	1234
	1209	1685	4178	16315	1898
	1524	2788	4137	12876	5039
Fig 2f
	Ctrl1	25 nM NTCP	50 nM NTCP	100 nM NTCP	100 nM NTCP G158R
	7919	7929	7566	11879	7871
	9533	9206	9742	12431	9114
	6602	9510	11811	24979	9633
Fig 2d

## Sheet: Fig 3
Fig 3a
	log (MyrB/ uM)	Normalized TC uptake (%)
	-4	93.7785	92.6833	97.6383
	-1.69897	91.8893	115.733	107.796
	-1	89.0682	86.2282	93.3046
	-0.69897	47.9938	45.3421	54.9227
	0	4.95817	4.55963	4.48118
	1	3.36716	2.06172	1.25523
Fig 3b

## Sheet: Supplementary Fig. 1
Supplementary Fig 1a
Supplementary Fig 1b
Supplementary Fig 1c

## Sheet: Supplementary Fig. 2
Supplementary Fig 2
	log conc (nM)	A450
	2.39794	82.1234	123.412	99.3648
	2.09691	83.4846	103.221	93.6933
	1.79588	79.6279	100.499	91.6515
	1.49485	71.0073	84.1652	83.0309
	1.19382	63.294	77.5862	74.8639
	0.89279	55.127	63.5209	67.6044
	0.59176	45.8258	46.9601	48.5481
	0.29073	36.5245	37.6588	34.029
	-0.0103	27.677	29.9456	25.6352
	-0.31133	22.9129	29.4918	23.5935
	-0.61236	22.0054	22.9129	21.3249
	-0.91339	21.3249	20.4174	19.7368
	-1.21442	21.3249	19.0563	23.8203
